# Supplementary material for: Evaluation of Swine Protection with Three Commercial Foot-and-Mouth Disease Vaccines against Heterologous Challenge with Type A ASIA/G-VII Lineage Viruses
Source: MDPI journal article supplement (doi:10.3390/vaccines12050476), 2024-04-29
Supplement: s1 [file s1]

Table S1. Levels of serological cross-reactivity between different vaccine antigens and A/ASIA/G-VII isolates using porcine sera from vaccinated pigs collected at the challenge day.

| Vaccine virus | Field virus                   |                 |                   |             |                               |      |                |             |
|---------------|-------------------------------|-----------------|-------------------|-------------|-------------------------------|------|----------------|-------------|
|               | A/TUR/13/2017                 |                 |                   |             | A/BHU/3/2017                  |      |                |             |
|               | VN titer (log <sub>10</sub> ) |                 | r <sub>1</sub>    | Matching    | VN titer (log <sub>10</sub> ) |      | r <sub>1</sub> | Matching    |
|               | HM <sup>1</sup>               | HT <sup>2</sup> |                   |             | HM                            | HT   |                |             |
| A/Iraq        | 1.95                          | 1.20            | 0.25 <sup>3</sup> | Non-matched | 1.95                          | 1.34 | 0.27           | Non-matched |
|               | 2.41                          | 1.95            |                   |             | 1.95                          | 1.34 |                |             |
|               | 1.81                          | 1.20            |                   |             | 2.26                          | 1.65 |                |             |
|               | 1.81                          | 1.20            |                   |             | 1.65                          | 1.20 |                |             |
| A/Cruzeiro    | 2.71                          | 1.95            | 0.23              | Non-matched | 1.81                          | 1.34 | 0.30           | Doubtful    |
|               | 1.95                          | 1.34            |                   |             | 2.11                          | 1.65 |                |             |
|               | 1.95                          | 1.81            |                   |             | 2.86                          | 1.95 |                |             |
|               | 2.71                          | 1.65            |                   |             | 2.11                          | 1.81 |                |             |
| A/2001        | 2.86                          | 1.95            | 0.27              | Non-matched | 1.95                          | 1.34 | 0.29           | Non-matched |
|               | 1.65                          | 1.34            |                   |             | 2.11                          | 1.65 |                |             |
|               | 2.11                          | 1.81            |                   |             | 2.71                          | 1.95 |                |             |
|               | 2.41                          | 1.65            |                   |             | 2.11                          | 1.81 |                |             |
| A/Zabaikalsky | 1.65                          | 1.34            | 0.36              | Matched     | 1.34                          | 0.78 | 0.26           | Non-matched |
|               | 1.51                          | 0.78            |                   |             | 1.65                          | 0.90 |                |             |
|               | 1.20                          | 0.90            |                   |             | 1.95                          | 1.34 |                |             |
|               | -                             | -               |                   |             | 1.95                          | 1.51 |                |             |

1. HM: Homologous VN titer; 2. HT: Heterologous VN titer; 3. Geometric mean
